# Supplementary material
Source: PubMed Central journal article supplement (PMC8237191)
Supplement: tobaccocontrol-2019-055404supp001.pdf [file tobaccocontrol-2019-055404supp001.pdf]

**Supplemental Figure 1:** Direct Comparative Risk (One-Question) Compared to Indirect Comparative Risk (Two-Questions) of E-Cigarette Harms Compared to Cigarettes Among Current Smokers

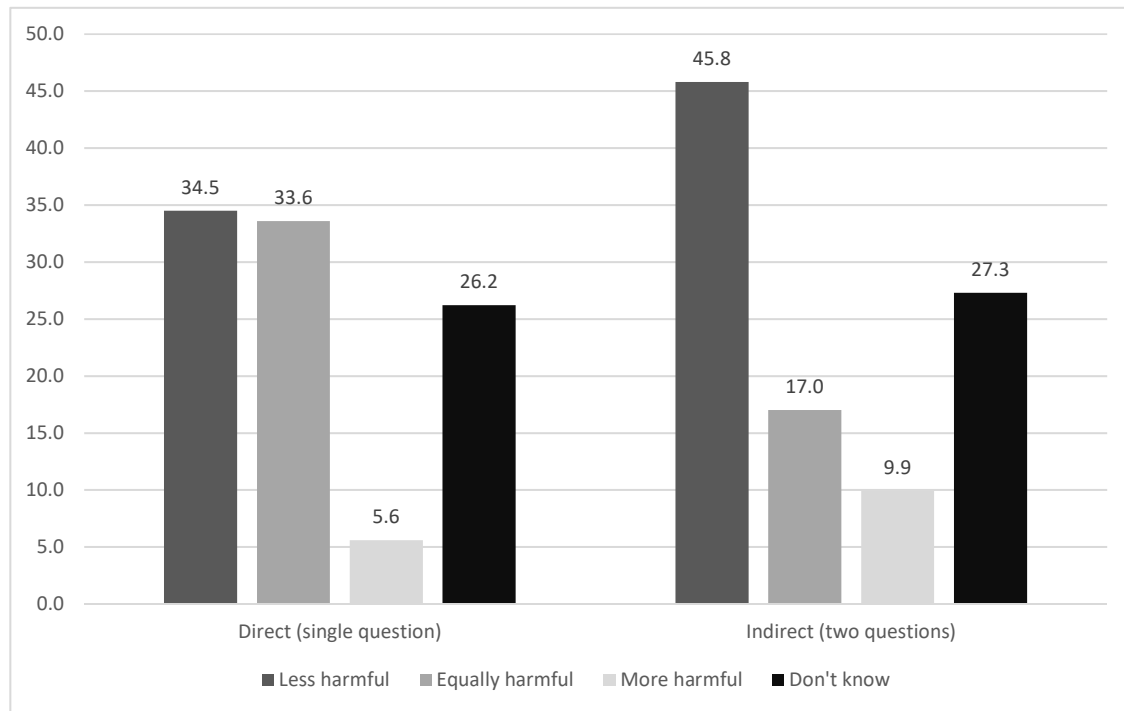

Supplemental Materials 1

**Supplemental Figure 2:** Direct Comparative Risk (One-Question) Compared to Indirect Comparative Risk (Two-Questions) of E-Cigarette Harms Compared to Cigarettes Among Former Smokers

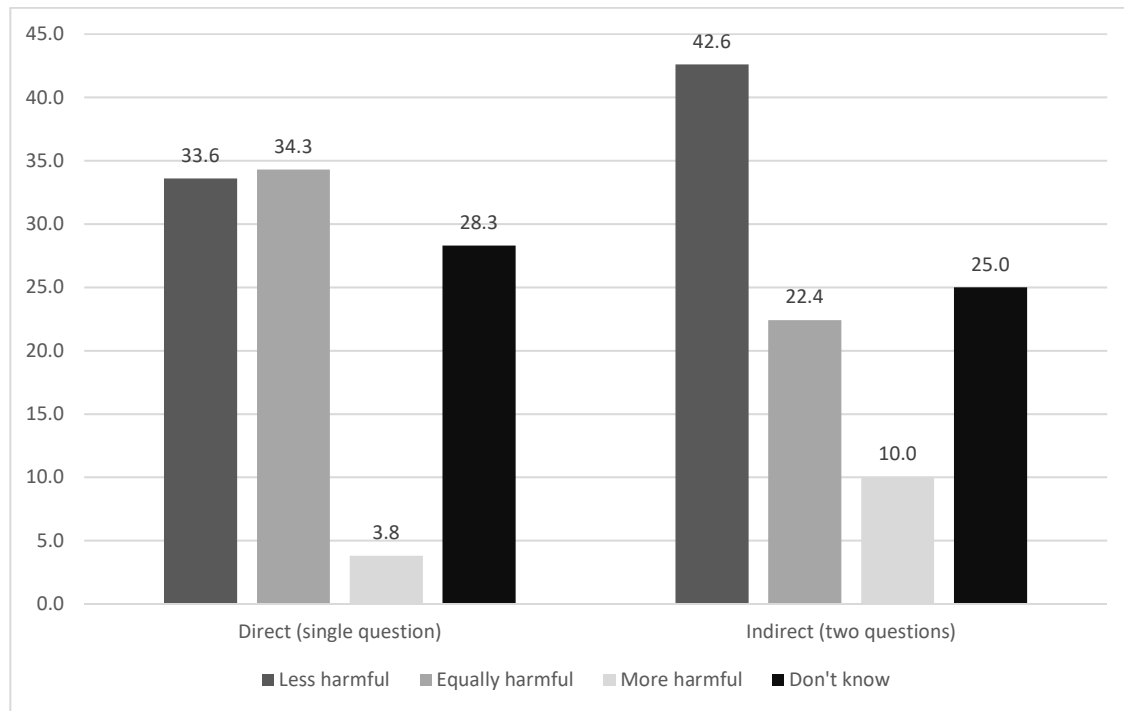

Supplemental Materials 2

**Supplemental Figure 3:** Direct Comparative Risk (one-question) Compared to Indirect Comparative Risk (Two-Questions) of E-Cigarette Harms Compared to Cigarettes Among Never Smokers

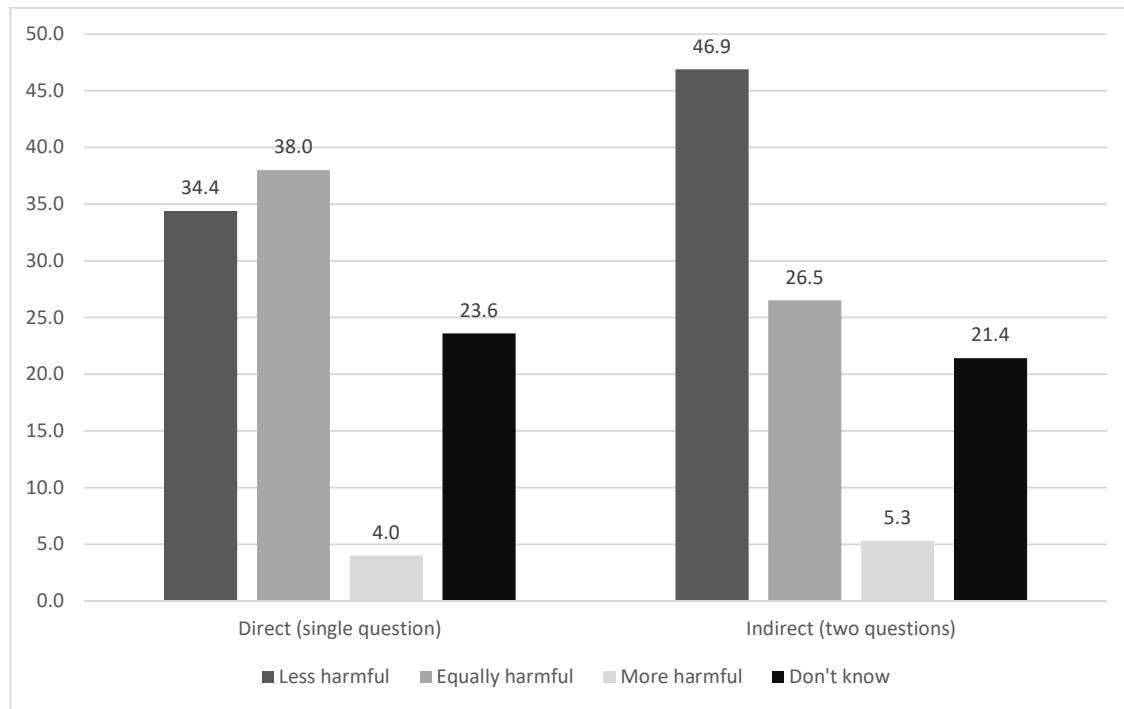

Supplemental Materials 3

**Supplemental Figure 4: Histogram of indirect risk calculated scores**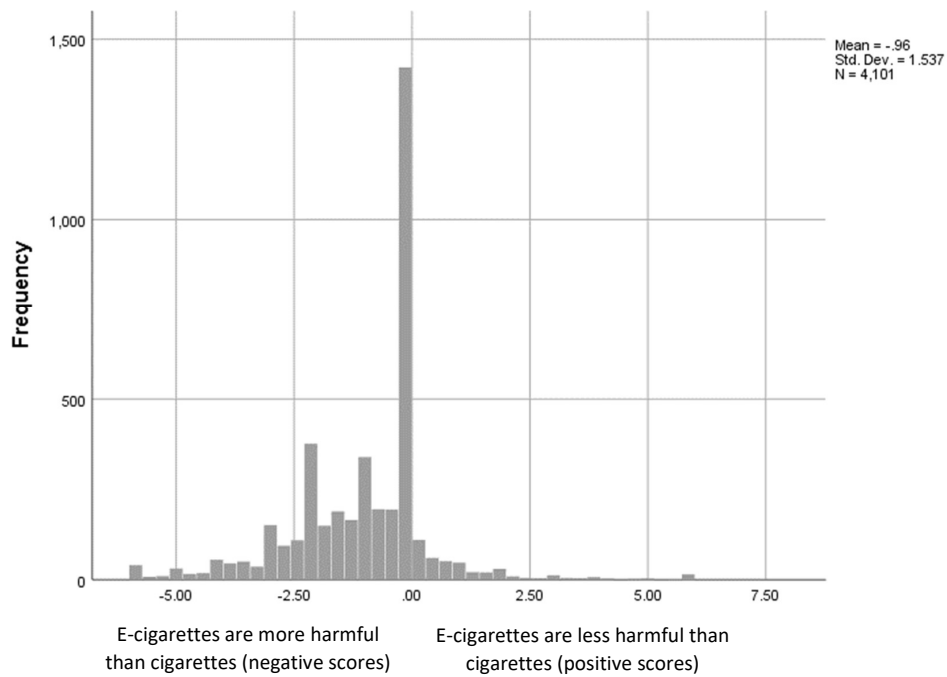

Supplemental Materials 4
